# Supplementary material for: Recurrence of Uterine Smooth Muscle Tumor of Uncertain Malignant Potential: A Systematic Review of the Literature
Source: MDPI journal article supplement (doi:10.3390/cancers14092323), 2022-05-07
Supplement: s1 [file s1]

Supplementary Table S1. Detailed data synthesis of included studies.

| Study              | Year | Sample size | Study design  | Age at surgery | Parity | Previous CS | Previous pelvic surgery | History of infertility | BMI     | Symptoms               | Symptoms                       | Signs         | Signs  | Ca 125 level | US signs                                                              | Largest tumor size (cm) | Myoma localization | Initial surgery | Type of initial surgery | Morcellation   | Mitosis | Atypia   | Necrosis | Second surgery | Recurrence | Site of recurrence | Histology of recurrence | Surgical treatment of recurrence | Months of follow up | Pregnancy outcomes | Note                               |
|--------------------|------|-------------|---------------|----------------|--------|-------------|-------------------------|------------------------|---------|------------------------|--------------------------------|---------------|--------|--------------|-----------------------------------------------------------------------|-------------------------|--------------------|-----------------|-------------------------|----------------|---------|----------|----------|----------------|------------|--------------------|-------------------------|----------------------------------|---------------------|--------------------|------------------------------------|
| Ning C et al. (27) | 2021 | 16          | Casere series | 34             |        |             | Unknown                 | Unknown                | Unknown |                        |                                |               |        | Unknown      |                                                                       |                         |                    | Myomectomy      | LPT                     | No or in a bag | 5-9     | Moderate | Absent   | No             | No         |                    |                         |                                  | 78                  | Yes                |                                    |
|                    | 2021 |             |               | 44             |        |             | Unknown                 | Unknown                | Unknown |                        |                                |               |        | Unknown      |                                                                       |                         |                    | Myomectomy      | LPS                     | Unknown        | 5-9     | Mild     | Absent   | No             | No         |                    |                         |                                  | 71                  | Yes                |                                    |
|                    | 2021 |             |               | 51             |        |             | Unknown                 | Unknown                | Unknown |                        |                                |               |        | Unknown      |                                                                       |                         |                    | TAH + BSO       | LPT                     | No or in a bag | 5-9     | Mild     | Absent   | No             | No         |                    |                         |                                  | 60                  | No                 |                                    |
|                    | 2021 |             |               | 18             |        |             | Unknown                 | Unknown                | Unknown |                        |                                |               |        | Unknown      |                                                                       |                         |                    | TAH + BSO       | LPT                     | No or in a bag | 5-9     | Mild     | Absent   | No             | No         |                    |                         |                                  | 60                  | No                 |                                    |
|                    | 2021 |             |               | 38             |        |             | Unknown                 | Unknown                | Unknown |                        |                                |               |        | Unknown      |                                                                       |                         |                    | Isterectomy     | LPS                     | Unknown        | 5-9     | Moderate | Absent   | No             | No         |                    |                         |                                  | 60                  | No                 |                                    |
|                    | 2021 |             |               | 51             |        |             | Unknown                 | Unknown                | Unknown |                        |                                |               |        | Unknown      |                                                                       |                         |                    | Isterectomy     | LPT                     | No or in a bag | 5-9     | Mild     | Absent   | No             | No         |                    |                         |                                  | 60                  | No                 |                                    |
|                    | 2021 |             |               | 53             |        |             | Unknown                 | Unknown                | Unknown |                        |                                |               |        | Unknown      |                                                                       |                         |                    | TAH + BSO       | LPS                     | Unknown        | 5-9     | Moderate | Absent   | No             | No         |                    |                         |                                  | 60                  | No                 |                                    |
|                    | 2021 |             |               | 40             |        |             | Unknown                 | Unknown                | Unknown |                        |                                |               |        | Unknown      |                                                                       |                         |                    | Isterectomy     | LPT                     | No or in a bag | 5-9     | Moderate | Absent   | No             | No         |                    |                         |                                  | 60                  | No                 |                                    |
|                    | 2021 |             |               | 46             |        |             | Unknown                 | Unknown                | Unknown |                        |                                |               |        | Unknown      |                                                                       |                         |                    | Isterectomy     | LPS                     | Unknown        | 5-9     | Moderate | Absent   | No             | No         |                    |                         |                                  | 60                  | No                 |                                    |
|                    | 2021 |             |               | 40             |        |             | Unknown                 | Unknown                | Unknown |                        |                                |               |        | Unknown      |                                                                       |                         |                    | Myomectomy      | LPS                     | Unknown        | 5-9     | Severe   | Absent   | No             | No         |                    |                         |                                  | 60                  | Unknown            |                                    |
|                    | 2021 |             |               | 53             |        |             | Unknown                 | Unknown                | Unknown |                        |                                |               |        | Unknown      |                                                                       |                         |                    | Myomectomy      | LPS                     | Unknown        | 5-9     | Moderate | Absent   | No             | No         |                    |                         |                                  | 60                  | Unknown            |                                    |
|                    | 2021 |             |               | 23             |        |             | Unknown                 | Unknown                | Unknown |                        |                                |               |        | Unknown      |                                                                       |                         |                    | Myomectomy      | LPS                     | Unknown        | 5-9     | Mild     | Absent   | No             | No         |                    |                         |                                  | 60                  | Unknown            |                                    |
|                    | 2021 |             |               | 38             |        |             | Unknown                 | Unknown                | Unknown |                        |                                |               |        | Unknown      |                                                                       |                         |                    | TAH + BSO       | LPS                     | Unknown        | 5-9     | Mild     | Absent   | No             | No         |                    |                         |                                  | 60                  | No                 |                                    |
|                    | 2021 |             |               | 52             |        |             | Unknown                 | Unknown                | Unknown |                        |                                |               |        | Unknown      |                                                                       |                         |                    | TAH + BSO       | LPT                     | No or in a bag | 5-9     | Severe   | Absent   | No             | No         |                    |                         |                                  | 60                  | No                 |                                    |
|                    | 2021 |             |               | 38             |        |             | Unknown                 | Unknown                | Unknown |                        |                                |               |        | Unknown      |                                                                       |                         |                    | Myomectomy      | LPS                     | Unknown        | 5-9     | Moderate | Present  | No             | No         |                    |                         |                                  | 60                  | Unknown            |                                    |
|                    | 2021 |             |               | 56             |        |             | Myomectomy              | Unknown                | Unknown |                        |                                |               |        | Unknown      |                                                                       |                         |                    | Isterectomy     | LPS                     | Unknown        | ≥10     | Moderate | Absent   | No             | Yes        | Pelvis             | STUMP                   | Mass excision                    | 112                 | No                 | Free from disease after 112 months |
| Akad F et al. (28) | 2021 | 1           | Casereport    | 50             | 2      | 0           | Unknown                 | Unknown                | Unknown | Abdominal /pelvic pain | Compression of adjacent organs | Pelvic masses | Anemia | Unknown      | a mixed structure consisting of both tissue type and cystic component | 19,5                    |                    | TAH + BSO       | LPT                     | No or in a bag | ≥10     | Mild     | Present  | No             | No         |                    |                         |                                  |                     | No                 |                                    |

|                           |          |    |                        |                         |   |   |                |             |             |                              |                 |                        |             |                                          |                                                    |       |                 |                 |                   |                   |              |             |              |              |     |             |           |              |    |             |  |
|---------------------------|----------|----|------------------------|-------------------------|---|---|----------------|-------------|-------------|------------------------------|-----------------|------------------------|-------------|------------------------------------------|----------------------------------------------------|-------|-----------------|-----------------|-------------------|-------------------|--------------|-------------|--------------|--------------|-----|-------------|-----------|--------------|----|-------------|--|
| Yadav<br>G et al.<br>(29) | 20<br>21 | 3  | Cas<br>e<br>seri<br>es | reprodu<br>ctive<br>age |   |   | Unknow<br>n    | Unkn<br>own | Unkn<br>own | AUB                          |                 |                        | Unkn<br>own | no<br>suspicio<br>n of<br>maligna<br>ncy | 7,0                                                | IM    | Myome<br>ctomy  | LPS             | No or in<br>a bag | ≥10               | Unkn<br>own  | Unkn<br>own | TAH +<br>BSO | No           |     |             |           |              | 24 | Unkno<br>wn |  |
|                           | 20<br>21 |    |                        | reprodu<br>ctive<br>age |   |   | Unknow<br>n    | Unkn<br>own | Unkn<br>own | AUB                          |                 |                        | Unkn<br>own | no<br>suspicio<br>n of<br>maligna<br>ncy | 7,0                                                | IM    | Myome<br>ctomy  | LPS             | No or in<br>a bag | ≥10               | Unkn<br>own  | Unkn<br>own | Unkno<br>wn  | No           |     |             |           |              | 24 | Unkno<br>wn |  |
|                           | 20<br>21 |    |                        | reprodu<br>ctive<br>age |   |   | Unknow<br>n    | Unkn<br>own | Unkn<br>own | AUB                          |                 |                        | Unkn<br>own | no<br>suspicio<br>n of<br>maligna<br>ncy | 7,0                                                | IM    | Myome<br>ctomy  | LPS             | No or in<br>a bag | ≥10               | Unkn<br>own  | Unkn<br>own | Unkno<br>wn  | No           |     |             |           |              | 24 | Unkno<br>wn |  |
| Jang TK<br>et al.<br>(30) | 20<br>20 | 1  | Cas<br>e<br>rep<br>ort | 41                      | 1 | 1 | No             | No          | > 30        | Abdominal<br>/pelvic<br>pain | Asthenia        | Pelv<br>ic<br>mas<br>s | Ane<br>mia  | < 35                                     | 39,0                                               | IM-SS | Isterecto<br>my | LPT             | No or in<br>a bag | ≥10               | Mode<br>rate | Abse<br>nt  | No           | No           |     |             |           |              | 18 | No          |  |
| Han<br>AKW et<br>al. (31) | 20<br>20 | 12 | Cas<br>e<br>seri<br>es | 31                      | 0 |   | No             | Unkn<br>own | Unkn<br>own | Abdominal<br>/pelvic<br>pain |                 |                        |             | Unkn<br>own                              | no<br>suspicio<br>n of<br>maligna<br>ncy           | 6,5   | Unkno<br>wn     | Myome<br>ctomy  | LPS               | Yes               | Unkn<br>own  | Unkn<br>own | Unkn<br>own  | No           | No  |             |           |              | 1  | Unkno<br>wn |  |
|                           | 20<br>20 |    |                        | 37                      | 3 | 0 | No             | No          | Unkn<br>own | Dysmenorr<br>hea             | Menorrhag<br>ia |                        |             | Unkn<br>own                              | no<br>suspicio<br>n of<br>maligna<br>ncy           | 2,7   | SM              | Myome<br>ctomy  | HSC               | No or in<br>a bag | Unkn<br>own  | Unkn<br>own | Unkn<br>own  | TAH +<br>BSO | Yes | Unkno<br>wn | STUM<br>P | TAH +<br>BSO | 4  | Unkno<br>wn |  |
|                           | 20<br>20 |    |                        | 41                      | 0 | 0 | No             | Yes         | Unkn<br>own | Incidental<br>ly detected    |                 |                        |             | Unkn<br>own                              | no<br>suspicio<br>n of<br>maligna<br>ncy           | 3,3   | Unkno<br>wn     | Myome<br>ctomy  | LPS               | Yes               | Unkn<br>own  | Unkn<br>own | Unkn<br>own  | No           | No  |             |           |              | 36 | Unkno<br>wn |  |
|                           | 20<br>20 |    |                        | 41                      | 0 | 0 | No             | Unkn<br>own | Unkn<br>own | Incidental<br>ly detected    |                 |                        |             | Unkn<br>own                              | no<br>suspicio<br>n of<br>maligna<br>ncy           | 10,0  | Unkno<br>wn     | Myome<br>ctomy  | LPS               | Yes               | Unkn<br>own  | Unkn<br>own | Unkn<br>own  | No           | No  |             |           |              | 36 | Unkno<br>wn |  |
|                           | 20<br>20 |    |                        | 28                      | 0 | 0 | Myome<br>ctomy | No          | Unkn<br>own |                              |                 | Pelv<br>ic<br>mas<br>s |             | Unkn<br>own                              | no<br>suspicio<br>n of<br>maligna<br>ncy           | 4,7   | Unkno<br>wn     | Myome<br>ctomy  | Unkn<br>own       | No or in<br>a bag | Unkn<br>own  | Unkn<br>own | Unkn<br>own  | No           | No  |             |           |              | 40 | Unkno<br>wn |  |
|                           | 20<br>20 |    |                        | 44                      | 0 | 0 | No             | Unkn<br>own | Unkn<br>own | Incidental<br>ly detected    |                 |                        |             | Unkn<br>own                              | no<br>suspicio<br>n of<br>maligna<br>ncy           | 4,7   | Unkno<br>wn     | Myome<br>ctomy  | LPS               | Yes               | Unkn<br>own  | Unkn<br>own | Unkn<br>own  | No           | No  |             |           |              | 22 | Unkno<br>wn |  |
|                           | 20<br>20 |    |                        | 40                      | 0 | 0 | Myome<br>ctomy | Unkn<br>own | Unkn<br>own |                              |                 | Pelv<br>ic<br>mas<br>s |             | Unkn<br>own                              | myoma<br>with<br>secondar<br>y<br>degenera<br>tion | 12,6  | Unkno<br>wn     | Isterecto<br>my | LPT               | No or in<br>a bag | Unkn<br>own  | Unkn<br>own | Unkn<br>own  | No           | No  |             |           |              | 23 | Unkno<br>wn |  |
|                           | 20<br>20 |    |                        | 36                      | 0 | 0 | No             | Unkn<br>own | Unkn<br>own | AUB                          |                 |                        |             | Unkn<br>own                              | no<br>suspicio<br>n of<br>maligna<br>ncy           | 4,8   | Unkno<br>wn     | Myome<br>ctomy  | LPS               | No or in<br>a bag | Unkn<br>own  | Unkn<br>own | Unkn<br>own  | No           | No  |             |           |              | 24 | Unkno<br>wn |  |
|                           | 20<br>20 |    |                        | 29                      | 0 | 0 | No             | Unkn<br>own | Unkn<br>own |                              |                 | Pelv<br>ic<br>mas<br>s |             | Unkn<br>own                              | no<br>suspicio<br>n of<br>maligna<br>ncy           | 7,4   | Unkno<br>wn     | Myome<br>ctomy  | LPS               | Yes               | Unkn<br>own  | Unkn<br>own | Unkn<br>own  | No           | No  |             |           |              | 24 | Yes         |  |
|                           | 20<br>20 |    |                        | 23                      | 0 | 0 | No             | Unkn<br>own | Unkn<br>own | Dysmenorr<br>hea             | Menorrhag<br>ia |                        |             | Unkn<br>own                              | no<br>suspicio<br>n of<br>maligna<br>ncy           | 6,2   | Unkno<br>wn     | Myome<br>ctomy  | LPS               | Yes               | Unkn<br>own  | Unkn<br>own | Unkn<br>own  | No           | No  |             |           |              | 24 | No          |  |
|                           | 20<br>20 |    |                        | 42                      | 0 | 0 | No             | Yes         | Unkn<br>own | Incidental<br>ly detected    |                 |                        |             | Unkn<br>own                              | no<br>suspicio<br>n of                             | 5,8   | Unkno<br>wn     | Myome<br>ctomy  | LPS               | Yes               | Unkn<br>own  | Unkn<br>own | Unkn<br>own  | TAH +<br>BSO | Yes | Unkno<br>wn | STUM<br>P | TAH +<br>BSO | 16 | No          |  |

|                      |      |    |       |    |   |         |         |         |                       |                                |                       |  |         |         | malignancy |      |           |             |                |                |                |           |         |         |     |        |       |             |    |         |                                   |                                   |         |  |
|----------------------|------|----|-------|----|---|---------|---------|---------|-----------------------|--------------------------------|-----------------------|--|---------|---------|------------|------|-----------|-------------|----------------|----------------|----------------|-----------|---------|---------|-----|--------|-------|-------------|----|---------|-----------------------------------|-----------------------------------|---------|--|
|                      | 2020 |    |       | 41 | 0 | 0       | No      | Yes     | Unknown               | Incidentally detected          |                       |  |         | Unknown |            | 4,0  | Unknown   | Myomectomy  | LPS            | No or in a bag | Unknown        | Unknown   | Unknown | No      | No  |        |       |             |    |         |                                   | 12                                | Unknown |  |
| Zheng YY et al. (32) | 2020 | 26 | Cases | 31 |   |         | Unknown | Unknown | Unknown               | Menorrhagia                    | Abdominal/pelvic pain |  |         | Unknown |            | 6,5  | IM        | Myomectomy  | LPT            | No or in a bag | 5-9            | Mode rate | Present | No      | No  |        |       |             |    |         | 96                                | Unknown                           |         |  |
|                      | 2020 |    |       | 48 |   |         | Unknown | Unknown | Unknown               | Incidentally detected          |                       |  |         | Unknown |            | 10,0 | IM        | Myomectomy  | LPT            | No or in a bag | 0-4            | Mode rate | Present | No      | Yes | Uterus | STUMP | Isterectomy |    | 95      | Unknown                           | Free from disease after 95 months |         |  |
|                      | 2020 |    |       | 42 |   |         | Unknown | Unknown | Unknown               | Menorrhagia                    |                       |  |         | Unknown |            | 5,5  | IM        | Isterectomy | LPT            | No or in a bag | 0-4            | Mild      | Present | No      | No  |        |       |             |    | 91      | No                                |                                   |         |  |
|                      | 2020 |    |       | 42 |   |         | Unknown | Unknown | Unknown               | Incidentally detected          |                       |  |         | Unknown |            | 3,5  | IM        | Myomectomy  | LPT            | No or in a bag | 0-4            | Mild      | Present | No      | No  |        |       |             |    | 36      | Unknown                           |                                   |         |  |
|                      | 2020 |    |       | 50 |   |         | Unknown | Unknown | Unknown               | Menorrhagia                    |                       |  |         | Unknown |            | 8,0  | IM        | TAH + BSO   | LPT            | No or in a bag | 0-4            | Mild      | Present | No      | No  |        |       |             |    | 76      | No                                |                                   |         |  |
|                      | 2020 |    |       | 44 |   |         | Unknown | Unknown | Unknown               | AUB                            |                       |  |         | Unknown |            | 11,0 | IM        | Isterectomy | LPT            | No or in a bag | 0-4            | None      | Present | No      | No  |        |       |             |    | 75      | No                                |                                   |         |  |
|                      | 2020 |    |       | 50 |   |         | Unknown | Unknown | Unknown               | AUB                            |                       |  |         | Unknown |            | 11,0 | IM        | Myomectomy  | LPT            | No or in a bag | 5-9            | Severe    | Present | No      | Yes | Uterus | STUMP | Isterectomy | 68 | No      | Free from disease after 68 months |                                   |         |  |
|                      | 2020 |    |       | 34 |   |         | Unknown | Unknown | Unknown               | Compression of adjacent organs |                       |  |         | Unknown |            | 7,0  | IM        | Myomectomy  | LPS            | Yes            | ≥10            | Mild      | Present | No      | No  |        |       |             |    | 88      | Unknown                           |                                   |         |  |
|                      | 2020 |    |       | 47 |   |         | Unknown | Unknown | Unknown               | Incidentally detected          |                       |  |         | Unknown |            | 8,0  | SS        | Isterectomy | LPT            | No or in a bag | ≥10            | None      | Present | No      | No  |        |       |             |    | 85      | No                                |                                   |         |  |
|                      | 2020 |    |       | 39 |   |         | Unknown | No      | Unknown               | Abdominal/pelvic pain          |                       |  |         | Unknown |            | 19,0 | SS        | Isterectomy | LPT            | No or in a bag | 5-9            | None      | Present | No      | No  |        |       |             |    | 77      | No                                |                                   |         |  |
|                      | 2020 |    |       | 23 |   |         | Unknown | Unknown | Unknown               | Menorrhagia                    |                       |  |         | Unknown |            | 9,0  | IM        | Myomectomy  | LPT            | No or in a bag | 5-9            | Severe    | Present | No      | Yes | Uterus | STUMP | Isterectomy | 74 | Unknown | Free from disease after 74 months |                                   |         |  |
|                      | 2020 |    |       | 44 |   |         | Unknown | Unknown | Unknown               | Incidentally detected          |                       |  |         | Unknown |            | 5,3  | IM        | Isterectomy | LPT            | No or in a bag | 0-4            | Severe    | Absent  | No      | No  |        |       |             |    | 73      | No                                |                                   |         |  |
|                      | 2020 |    |       | 38 |   |         | Unknown | Unknown | Unknown               | Menorrhagia                    |                       |  |         | Unknown |            | 8,0  | IM        | Myomectomy  | LPS            | Yes            | 5-9            | Mild      | Present | No      | No  |        |       |             |    | 72      | Unknown                           |                                   |         |  |
|                      | 2020 |    |       | 54 |   |         | Unknown | Unknown | Unknown               | Menorrhagia                    | Dysmenorrhea          |  |         |         | Unknown    |      | 6,7       | SM          | TAH + BSO      | LPT            | No or in a bag | 5-9       | Mild    | Present | No  | No     |       |             |    | 70      | No                                |                                   |         |  |
|                      | 2020 |    |       | 35 |   |         | Unknown | Unknown | Unknown               | Incidentally detected          |                       |  |         | Unknown |            | 3,7  | SS        | Myomectomy  | LPT            | No or in a bag | 5-9            | Mode rate | Present | No      | No  |        |       |             |    | 69      | Unknown                           |                                   |         |  |
|                      | 2020 |    |       | 48 |   |         | Unknown | Unknown | Unknown               | Incidentally detected          |                       |  |         | Unknown |            | 2,5  | IM        | Myomectomy  | LPT            | No or in a bag | 5-9            | Severe    | Present | No      | Yes | Uterus | STUMP | Isterectomy | 68 | Unknown | Free from disease after 68 months |                                   |         |  |
|                      | 2020 |    |       | 43 |   |         | Unknown | Unknown | Unknown               | Menorrhagia                    |                       |  |         | Unknown |            | 10,0 | IM        | Isterectomy | LPT            | No or in a bag | 0-4            | Severe    | Present | No      | No  |        |       |             |    | 66      | No                                |                                   |         |  |
|                      | 2020 |    |       | 35 |   |         | Unknown | Unknown | Unknown               | Incidentally detected          |                       |  |         | Unknown |            | 7,5  | SM        | Myomectomy  | LPT            | No or in a bag | 5-9            | Mode rate | Present | No      | No  |        |       |             |    | 67      | Unknown                           |                                   |         |  |
|                      | 2020 |    |       | 45 |   |         | Unknown | Unknown | Unknown               | Menorrhagia                    |                       |  |         | Unknown |            | 6,4  | SM        | Isterectomy | LPS            | Yes            | 0-4            | Severe    | Present | No      | No  |        |       |             |    | 59      | No                                |                                   |         |  |
|                      | 2020 |    |       | 47 |   |         | Unknown | Unknown | Unknown               | Incidentally detected          |                       |  |         | Unknown |            | 14,0 | IM        | Myomectomy  | LPS            | Yes            | 5-9            | None      | Present | No      | Yes | Uterus | STUMP | Isterectomy | 58 | Unknown | Free from disease after 58 months |                                   |         |  |
| 2020                 |      |    | 43    |    |   | Unknown | Unknown | Unknown | Incidentally detected |                                |                       |  | Unknown |         | 8,5        | SS   | TAH + BSO | LPT         | No or in a bag | 5-9            | Mode rate      | Present   | No      | No      |     |        |       |             | 54 | No      |                                   |                                   |         |  |

|                               |      |    |            |    |   |  |         |         |         |                       |  |               |  |         |  |      |         |             |         |                |     |           |         |           |     |            |       |               |    |         |                                               |
|-------------------------------|------|----|------------|----|---|--|---------|---------|---------|-----------------------|--|---------------|--|---------|--|------|---------|-------------|---------|----------------|-----|-----------|---------|-----------|-----|------------|-------|---------------|----|---------|-----------------------------------------------|
|                               | 2020 |    |            | 61 |   |  | Unknown | Unknown | Unknown | AUB                   |  |               |  | Unknown |  | 2,5  | IM      | TAH + BSO   | LPT     | No or in a bag | 0-4 | Mode rate | Present | No        | No  |            |       |               | 53 | No      |                                               |
|                               | 2020 |    |            | 49 |   |  | Unknown | Unknown | Unknown | Menorrhagia           |  |               |  | Unknown |  | 5,3  | IM      | Isterectomy | LPS     | Yes            | 0-4 | Mild      | Present | No        | No  |            |       |               | 49 | No      |                                               |
|                               | 2020 |    |            | 44 |   |  | Unknown | Unknown | Unknown | Incidentally detected |  |               |  | Unknown |  | 11,0 | IM      | Myomectomy  | LPS     | Yes            | 0-4 | Severe    | Present | No        | Yes | Uterus     | STUMP | Isterectomy   | 36 | Unknown | Free from disease after 36 months             |
|                               | 2020 |    |            | 39 |   |  | Unknown | Unknown | Unknown | Menorrhagia           |  |               |  | Unknown |  | 6,7  | IM      | Isterectomy | LPS     | Yes            | 0-4 | Severe    | Absent  | No        | No  |            |       |               | 35 | No      |                                               |
|                               | 2020 |    |            | 42 |   |  | Unknown | Unknown | Unknown | Abdominal/pelvic pain |  |               |  | Unknown |  | 15,0 | SS      | Myomectomy  | LPS     | Yes            | 5-9 | Severe    | Present | No        | No  |            |       |               | 13 | Unknown |                                               |
| Garcia-Sanchez JM et al. (33) | 2019 | 1  | Casereport | 71 |   |  | No      | Unknown | Unknown | Incidentally detected |  |               |  | Unknown |  | 16,0 | Unknown | TAH + BSO   | LPT     | No or in a bag | 5-9 | Mode rate | Present | No        | Yes | Other site | LMS   | Mass excision |    | Unknown | Localization of recurrence: right lower limb  |
| Karatasli V et al. (34)       | 2019 | 28 | Caseries   | 53 | 6 |  | Unknown | No      | > 30    |                       |  | Pelvic masses |  | < 35    |  | 27,0 | SS      | TAH + BSO   | LPT     | No or in a bag | 0-4 | Mild      | Present | No        | No  |            |       |               | 44 | Unknown |                                               |
|                               | 2019 |    |            | 58 | 6 |  | Unknown | No      | > 30    | AUB                   |  |               |  | < 35    |  | 4,0  | IM      | TAH + BSO   | LPT     | No or in a bag | 0-4 | Mode rate | Absent  | No        | No  |            |       |               | 6  | Yes     |                                               |
|                               | 2019 |    |            | 46 | 2 |  | Unknown | No      | > 30    | AUB                   |  |               |  | < 35    |  | 5,5  | IM      | TAH + BSO   | LPS     | Unknown        | 5-9 | Mode rate | Absent  | No        | No  |            |       |               | 8  | Unknown |                                               |
|                               | 2019 |    |            | 75 | 4 |  | Unknown | No      | > 30    |                       |  | Pelvic masses |  | > 35    |  | 12,0 | SS      | TAH + BSO   | LPT     | No or in a bag | 0-4 | Mode rate | Absent  | No        | No  |            |       |               | 12 | Unknown |                                               |
|                               | 2019 |    |            | 40 | 1 |  | Unknown | No      | < 30    |                       |  | Pelvic masses |  | < 35    |  | 16,0 | SM      | Isterectomy | LPT     | No or in a bag | 0-4 | Mild      | Absent  | No        | No  |            |       |               | 12 | Unknown |                                               |
|                               | 2019 |    |            | 35 | 2 |  | Unknown | No      | < 30    | AUB                   |  |               |  | < 35    |  | 5,0  | IM      | Myomectomy  | Unknown | Unknown        | 0-4 | Mild      | Absent  | No        | No  |            |       |               | 14 | Unknown |                                               |
|                               | 2019 |    |            | 43 | 2 |  | Unknown | No      | < 30    |                       |  | Pelvic masses |  | < 35    |  | 11,0 | SS      | Myomectomy  | Unknown | Unknown        | 0-4 | Mild      | Present | TAH + BSO | No  |            |       |               | 17 | Unknown |                                               |
|                               | 2019 |    |            | 50 | 3 |  | Unknown | No      | < 30    | AUB                   |  |               |  | < 35    |  | 8,0  | SS      | TAH + BSO   | LPT     | No or in a bag | 0-4 | Mild      | Absent  | No        | No  |            |       |               | 18 | Unknown |                                               |
|                               | 2019 |    |            | 40 | 0 |  | Unknown | Unknown | < 30    |                       |  | Pelvic masses |  | > 35    |  | 12,0 | IM      | Isterectomy | LPT     | No or in a bag | 5-9 | Mode rate | Absent  | No        | No  |            |       |               | 48 | Yes     |                                               |
|                               | 2019 |    |            | 52 | 2 |  | Unknown | No      | < 30    |                       |  | Pelvic masses |  | < 35    |  | 9,0  | IM      | TAH + BSO   | LPS     | Unknown        | 0-4 | Mild      | Absent  | No        | No  |            |       |               | 61 | Unknown |                                               |
|                               | 2019 |    |            | 42 | 2 |  | Unknown | No      | > 30    | AUB                   |  |               |  | < 35    |  | 8,5  | IM      | Myomectomy  | Unknown | Unknown        | 0-4 | Mild      | Absent  | TAH + BSO | No  |            |       |               | 47 | Unknown |                                               |
|                               | 2019 |    |            | 43 | 2 |  | Unknown | No      | < 30    | AUB                   |  |               |  | < 35    |  | 7,0  | IM      | Isterectomy | LPT     | No or in a bag | 5-9 | Mild      | Absent  | No        | No  |            |       |               | 24 | Unknown |                                               |
|                               | 2019 |    |            | 54 | 3 |  | Unknown | No      | > 30    | AUB                   |  |               |  | < 35    |  | 8,0  | IM      | TAH + BSO   | LPT     | No or in a bag | 0-4 | Mode rate | Present | No        | Yes | Pelvis     | LMS   |               | 62 | Unknown | Died of disease (lyposarcoma) after 62 months |
|                               | 2019 |    |            | 29 | 1 |  | Unknown | No      | < 30    | Incidentally detected |  |               |  | < 35    |  | 10,0 | IM      | Myomectomy  | Unknown | Unknown        | 0-4 | Mild      | Present | No        | No  |            |       |               | 39 | Unknown |                                               |
|                               | 2019 |    |            | 48 | 2 |  | Unknown | No      | < 30    |                       |  | Pelvic masses |  | < 35    |  | 6,0  | IM      | TAH + BSO   | LPT     | No or in a bag | 0-4 | Mode rate | Absent  | No        | No  |            |       |               | 6  | Unknown |                                               |

|                      |      |    |                        |    |   |  |              |             |             |                           |  |                        |  |             |  |      |             |                 |             |                   |     |              |             |                 |     |        |           |                  |  |             |             |  |
|----------------------|------|----|------------------------|----|---|--|--------------|-------------|-------------|---------------------------|--|------------------------|--|-------------|--|------|-------------|-----------------|-------------|-------------------|-----|--------------|-------------|-----------------|-----|--------|-----------|------------------|--|-------------|-------------|--|
|                      | 2019 |    |                        | 41 | 2 |  | Unknown<br>n | No          | > 30        | AUB                       |  |                        |  | < 35        |  | 2,0  | IM          | Isterecto<br>my | LPS         | Unknown<br>n      | 5-9 | Mild         | Abse<br>nt  | No              | No  |        |           |                  |  | 48          | Unkno<br>wn |  |
|                      | 2019 |    |                        | 39 | 2 |  | Unknown<br>n | No          | < 30        | AUB                       |  |                        |  | < 35        |  | 6,0  | IM          | Myome<br>ctomy  | Unkn<br>own | Unknown<br>n      | 0-4 | Mode<br>rate | Abse<br>nt  | Isterect<br>omy | No  |        |           |                  |  | 52          | Unkno<br>wn |  |
|                      | 2019 |    |                        | 42 | 2 |  | Unknown<br>n | No          | < 30        | AUB                       |  |                        |  | < 35        |  | 7,5  | IM          | Isterecto<br>my | LPT         | No or in<br>a bag | 5-9 | Mode<br>rate | Abse<br>nt  | No              | No  |        |           |                  |  | 47          | Unkno<br>wn |  |
|                      | 2019 |    |                        | 39 | 2 |  | Unknown<br>n | No          | < 30        | AUB                       |  |                        |  | < 35        |  | 22,0 | IM          | Isterecto<br>my | LPT         | No or in<br>a bag | 5-9 | Mode<br>rate | Abse<br>nt  | No              | No  |        |           |                  |  | 56          | Unkno<br>wn |  |
|                      | 2019 |    |                        | 45 | 3 |  | Unknown<br>n | No          | > 30        | AUB                       |  |                        |  | < 35        |  | 5,0  | IM          | Isterecto<br>my | LPS         | No or in<br>a bag | 0-4 | Mode<br>rate | Abse<br>nt  | No              | No  |        |           |                  |  | 23          | Unkno<br>wn |  |
|                      | 2019 |    |                        | 46 | 3 |  | Unknown<br>n | No          | > 30        | AUB                       |  |                        |  | < 35        |  | 5,0  | IM          | TAH +<br>BSO    | LPT         | No or in<br>a bag | 0-4 | Sever<br>e   | Abse<br>nt  | No              | No  |        |           |                  |  | 31          | Unkno<br>wn |  |
|                      | 2019 |    |                        | 34 | 1 |  | Unknown<br>n | No          | < 30        | AUB                       |  |                        |  | < 35        |  | 5,0  | IM          | Myome<br>ctomy  | Unkn<br>own | Unknown<br>n      | 0-4 | Sever<br>e   | Abse<br>nt  | No              | No  |        |           |                  |  | 44          | Yes         |  |
|                      | 2019 |    |                        | 49 | 1 |  | Unknown<br>n | No          | > 30        | AUB                       |  |                        |  | < 35        |  | 4,0  | IM          | TAH +<br>BSO    | LPS         | Unknown<br>n      | 5-9 | Sever<br>e   | Abse<br>nt  | No              | No  |        |           |                  |  | 5           | Unkno<br>wn |  |
|                      | 2019 |    |                        | 48 | 2 |  | Unknown<br>n | No          | > 30        | AUB                       |  |                        |  | < 35        |  | 5,0  | IM          | TAH +<br>BSO    | LPT         | No or in<br>a bag | 5-9 | Mild         | Abse<br>nt  | No              | No  |        |           |                  |  | 15          | Unkno<br>wn |  |
|                      | 2019 |    |                        | 43 | 3 |  | Unknown<br>n | No          | < 30        |                           |  | Pelv<br>ic<br>mas<br>s |  | < 35        |  | 6,0  | IM          | Isterecto<br>my | LPT         | No or in<br>a bag | 5-9 | None         | Abse<br>nt  | No              | No  |        |           |                  |  | 163         | Unkno<br>wn |  |
|                      | 2019 |    |                        | 43 | 2 |  | Unknown<br>n | No          | > 30        | AUB                       |  |                        |  | < 35        |  | 6,5  | IM          | Isterecto<br>my | LPT         | No or in<br>a bag | 0-4 | Mode<br>rate | Abse<br>nt  | No              | No  |        |           |                  |  | 57          | Unkno<br>wn |  |
|                      | 2019 |    |                        | 31 | 2 |  | Unknown<br>n | No          | < 30        |                           |  | Pelv<br>ic<br>mas<br>s |  | < 35        |  | 4,5  | IM          | TAH +<br>BSO    | LPT         | No or in<br>a bag | 0-4 | Mode<br>rate | Abse<br>nt  | No              | No  |        |           |                  |  | 180         | Unkno<br>wn |  |
|                      | 2019 |    |                        | 38 | 2 |  | Unknown<br>n | No          | < 30        | AUB                       |  |                        |  | < 35        |  | 3,0  | SS          | Myome<br>ctomy  | Unkn<br>own | Unknown<br>n      | 0-4 | Mode<br>rate | Abse<br>nt  | TAH +<br>BSO    | No  |        |           |                  |  | 131         | Unkno<br>wn |  |
| Ha HI et<br>al. (35) | 2018 | 19 | Cas<br>e<br>seri<br>es | 41 | 3 |  | Unknown<br>n | No          | Unkn<br>own | Incidentall<br>y detected |  |                        |  | Unkn<br>own |  | 7,0  | Unkno<br>wn | Isterecto<br>my | LPT         | No or in<br>a bag | 0-4 | Mode<br>rate | Abse<br>nt  | No              | No  |        |           |                  |  |             | Unkno<br>wn |  |
|                      | 2018 |    |                        | 30 | 0 |  | Unknown<br>n | No          | Unkn<br>own | Incidentall<br>y detected |  |                        |  | Unkn<br>own |  | 8,0  | Unkno<br>wn | Myome<br>ctomy  | Unkn<br>own | Unknown<br>n      | 0-4 | Mild         | Abse<br>nt  | No              | No  |        |           |                  |  |             | Unkno<br>wn |  |
|                      | 2018 |    |                        | 47 | 2 |  | Unknown<br>n | No          | Unkn<br>own | Incidentall<br>y detected |  |                        |  | Unkn<br>own |  | 9,0  | Unkno<br>wn | TAH +<br>BSO    | LPT         | No or in<br>a bag | 0-4 | Mode<br>rate | Abse<br>nt  | No              | No  |        |           |                  |  |             | Unkno<br>wn |  |
|                      | 2018 |    |                        | 48 | 3 |  | Unknown<br>n | Unkn<br>own | Unkn<br>own | Incidentall<br>y detected |  |                        |  | Unkn<br>own |  | 12,0 | Unkno<br>wn | Isterecto<br>my | LPT         | No or in<br>a bag | 5-9 | Mild         | Abse<br>nt  | No              | No  |        |           |                  |  |             | Unkno<br>wn |  |
|                      | 2018 |    |                        | 40 | 2 |  | Unknown<br>n | Unkn<br>own | Unkn<br>own | Incidentall<br>y detected |  |                        |  | Unkn<br>own |  | 12,0 | Unkno<br>wn | Isterecto<br>my | LPT         | No or in<br>a bag | ≥10 | Mild         | Abse<br>nt  | No              | No  |        |           |                  |  |             | Unkno<br>wn |  |
|                      | 2018 |    |                        | 49 | 2 |  | Unknown<br>n | Unkn<br>own | Unkn<br>own | Incidentall<br>y detected |  |                        |  | Unkn<br>own |  | 4,0  | Unkno<br>wn | Isterecto<br>my | Unkn<br>own | Unknown<br>n      | 5-9 | Mild         | Abse<br>nt  | No              | No  |        |           |                  |  |             | Unkno<br>wn |  |
|                      | 2018 |    |                        | 48 | 3 |  | Unknown<br>n | Unkn<br>own | Unkn<br>own | Incidentall<br>y detected |  |                        |  | Unkn<br>own |  | 9,5  | Unkno<br>wn | Myome<br>ctomy  | Unkn<br>own | Unknown<br>n      | 0-4 | Mild         | Abse<br>nt  | No              | No  |        |           |                  |  |             | Unkno<br>wn |  |
|                      | 2018 |    |                        | 49 | 2 |  | Unknown<br>n | Unkn<br>own | Unkn<br>own | Incidentall<br>y detected |  |                        |  | Unkn<br>own |  | 12,0 | Unkno<br>wn | Myome<br>ctomy  | Unkn<br>own | Unknown<br>n      | 5-9 | Mild         | Presen<br>t | TAH +<br>BSO    | No  |        |           |                  |  | Unkno<br>wn |             |  |
|                      | 2018 |    |                        | 30 | 0 |  | Unknown<br>n | Unkn<br>own | Unkn<br>own | Incidentall<br>y detected |  |                        |  | Unkn<br>own |  | 8,0  | Unkno<br>wn | Myome<br>ctomy  | Unkn<br>own | Unknown<br>n      | 5-9 | Mode<br>rate | Abse<br>nt  | No              | No  |        |           |                  |  |             | Unkno<br>wn |  |
|                      | 2018 |    |                        | 46 | 1 |  | Unknown<br>n | Unkn<br>own | Unkn<br>own | Incidentall<br>y detected |  |                        |  | Unkn<br>own |  | 10,0 | Unkno<br>wn | Isterecto<br>my | LPT         | No or in<br>a bag | ≥10 | Mild         | Abse<br>nt  | No              | No  |        |           |                  |  |             | Unkno<br>wn |  |
|                      | 2018 |    |                        | 39 | 1 |  | Unknown<br>n | Unkn<br>own | Unkn<br>own | Incidentall<br>y detected |  |                        |  | Unkn<br>own |  | 10,0 | Unkno<br>wn | Myome<br>ctomy  | Unkn<br>own | Unknown<br>n      | 0-4 | Mode<br>rate | Presen<br>t | No              | Yes | Pelvis | STUM<br>P | Mass<br>excision |  |             | Unkno<br>wn |  |
|                      | 2018 |    |                        | 49 | 1 |  | Unknown<br>n | Unkn<br>own | Unkn<br>own | Incidentall<br>y detected |  |                        |  | Unkn<br>own |  | 7,0  | Unkno<br>wn | Isterecto<br>my | LPT         | No or in<br>a bag | 0-4 | Mode<br>rate | Abse<br>nt  | No              | No  |        |           |                  |  |             | Unkno<br>wn |  |
|                      | 2018 |    |                        | 40 | 2 |  | Unknown<br>n | Unkn<br>own | Unkn<br>own | Incidentall<br>y detected |  |                        |  | Unkn<br>own |  | 13,0 | Unkno<br>wn | Myome<br>ctomy  | Unkn<br>own | Unknown<br>n      | ≥10 | Mild         | Abse<br>nt  | Isterect<br>omy | No  |        |           |                  |  |             | Unkno<br>wn |  |
|                      | 2018 |    |                        | 32 | 1 |  | Unknown<br>n | Unkn<br>own | Unkn<br>own | Incidentall<br>y detected |  |                        |  | Unkn<br>own |  | 6,0  | Unkno<br>wn | Myome<br>ctomy  | Unkn<br>own | Unknown<br>n      | 5-9 | Mode<br>rate | Abse<br>nt  | No              | No  |        |           |                  |  |             | Unkno<br>wn |  |

|                       |      |    |             |    |   |  |            |         |         |                        |                        |               |        |         |                                                                      |      |         |             |         |                |     |           |         |    |     |        |     |                 |     |         |                                                 |
|-----------------------|------|----|-------------|----|---|--|------------|---------|---------|------------------------|------------------------|---------------|--------|---------|----------------------------------------------------------------------|------|---------|-------------|---------|----------------|-----|-----------|---------|----|-----|--------|-----|-----------------|-----|---------|-------------------------------------------------|
|                       | 2018 |    |             | 33 | 0 |  | Unknown    | Unknown | Unknown | Incidental             |                        |               |        | Unknown |                                                                      | 6,0  | Unknown | Myomectomy  | Unknown | Unknown        | 5-9 | Mode rate | Absent  | No | No  |        |     |                 |     | Yes     |                                                 |
|                       | 2018 |    |             | 45 | 1 |  | Unknown    | Unknown | Unknown | Incidental             |                        |               |        | Unknown |                                                                      | 10,0 | Unknown | Isterectomy | LPT     | No or in a bag | 5-9 | Mode rate | Absent  | No | No  |        |     |                 |     | Unknown |                                                 |
|                       | 2018 |    |             | 49 | 2 |  | Unknown    | Unknown | Unknown | Incidental             |                        |               |        | Unknown |                                                                      | 6,0  | Unknown | Isterectomy | LPS     | Unknown        | 0-4 | Mild      | Absent  | No | Yes | Pelvis | LMS | Mass excision   | 24  | Unknown |                                                 |
|                       | 2018 |    |             | 35 | 0 |  | Myomectomy | Unknown | Unknown | Incidental             |                        |               |        | Unknown |                                                                      | 7,0  | Unknown | Myomectomy  | Unknown | Unknown        | 0-4 | Mild      | Absent  | No | No  |        |     |                 |     | Unknown |                                                 |
|                       | 2018 |    |             | 28 | 0 |  | Unknown    | Unknown | Unknown | Incidental             |                        |               |        | Unknown |                                                                      | 26,0 | Unknown | Myomectomy  | Unknown | Unknown        | 5-9 | Mild      | Absent  | No | No  |        |     |                 |     | Unknown |                                                 |
| Huges L et al. (36)   | 2018 | 1  | Case report | 20 | 0 |  | No         | No      | Unknown | Menorrhagia            | Abdominal /pelvic pain | Pelvic masses | Anemia | Unknown | Subserosal fibroids at hte fundus of the uterus measuring 20 x 18 cm | 20,0 | SS      | Myomectomy  | LPT     | No or in a bag | 5-9 | Mode rate | Absent  | No | No  |        |     |                 |     | Unknown |                                                 |
| Oda H et al. (37)     | 2018 | 1  | Case report | 40 |   |  | Unknown    | Unknown | Unknown | Abdominal /pelvic pain |                        | Anemia        |        | > 35    | Peritoneal bleeding                                                  | 22,0 | Unknown | Myomectomy  | LPT     | No or in a bag | 5-9 | Mild      | Absent  | No | Yes | Pelvis | LMS | Debulking + CTx | 40  | Unknown | Died of desease 40 months after initial surgery |
|                       | 2018 | 21 | Case series | 28 |   |  | Unknown    | Unknown | Unknown | Incidental             |                        |               |        | Unknown |                                                                      | 15,0 | Unknown | Myomectomy  | LPT     | No or in a bag | 5-9 | Mode rate | Absent  | No | No  |        |     |                 | 33  | Unknown |                                                 |
|                       | 2018 |    |             | 63 |   |  | Unknown    | Unknown | Unknown | Incidental             |                        |               |        | Unknown |                                                                      | 2,5  | Unknown | TAH + BSO   | LPT     | No or in a bag | 0-4 | Severe    | Absent  | No | No  |        |     |                 | 78  | Unknown |                                                 |
|                       | 2018 |    |             | 42 |   |  | Unknown    | Unknown | Unknown | Incidental             |                        |               |        | Unknown |                                                                      | 5,5  | Unknown | TAH + BSO   | LPT     | No or in a bag | 0-4 | Mild      | Present | No | No  |        |     |                 | 8   | Unknown |                                                 |
|                       | 2018 |    |             | 64 |   |  | Unknown    | Unknown | Unknown | Incidental             |                        |               |        | Unknown |                                                                      | 18,0 | Unknown | TAH + BSO   | LPT     | No or in a bag | 0-4 | None      | Present | No | No  |        |     |                 | 22  | Unknown | Non disease-related death                       |
|                       | 2018 |    |             | 48 |   |  | Unknown    | Unknown | Unknown | Incidental             |                        |               |        | Unknown |                                                                      | 8,0  | Unknown | TAH + BSO   | LPT     | No or in a bag | 0-4 | Mild      | Present | No | No  |        |     |                 | 56  | Unknown |                                                 |
|                       | 2018 |    |             | 52 |   |  | Unknown    | Unknown | Unknown | Incidental             |                        |               |        | Unknown |                                                                      | 8,0  | Unknown | TAH + BSO   | LPT     | No or in a bag | 5-9 | Mild      | Present | No | No  |        |     |                 | 99  | Unknown |                                                 |
|                       | 2018 |    |             | 47 |   |  | Unknown    | Unknown | Unknown | Incidental             |                        |               |        | Unknown |                                                                      | 4,0  | Unknown | TAH + BSO   | LPT     | No or in a bag | 0-4 | None      | Present | No | No  |        |     |                 | 132 | Unknown |                                                 |
| Basaran D et al. (38) | 2018 |    |             | 37 |   |  | Unknown    | Unknown | Unknown | Incidental             |                        |               |        | Unknown |                                                                      | 1,8  | Unknown | Isterectomy | LPT     | No or in a bag | 0-4 | Mild      | Present | No | No  |        |     |                 | 39  | Unknown |                                                 |
|                       | 2018 |    |             | 40 |   |  | Unknown    | Unknown | Unknown | Incidental             |                        |               |        | Unknown |                                                                      | 4,0  | Unknown | Isterectomy | LPT     | No or in a bag | 0-4 | Mode rate | Present | No | No  |        |     |                 | 68  | Unknown |                                                 |
|                       | 2018 |    |             | 39 |   |  | Unknown    | Unknown | Unknown | Incidental             |                        |               |        | Unknown |                                                                      | 5,5  | Unknown | Myomectomy  | LPT     | No or in a bag | 0-4 | None      | Present | No | No  |        |     |                 | 10  | Unknown |                                                 |
|                       | 2018 |    |             | 37 |   |  | Unknown    | Unknown | Unknown | Incidental             |                        |               |        | Unknown |                                                                      | 11,0 | Unknown | Myomectomy  | LPT     | No or in a bag | 0-4 | Mode rate | Present | No | No  |        |     |                 | 12  | Unknown |                                                 |
|                       | 2018 |    |             | 20 |   |  | Unknown    | Unknown | Unknown | Incidental             |                        |               |        | Unknown |                                                                      | 15,0 | Unknown | Myomectomy  | LPT     | No or in a bag | 0-4 | None      | Present | No | No  |        |     |                 | 52  | Unknown |                                                 |
|                       | 2018 |    |             | 28 |   |  | Unknown    | Unknown | Unknown | Incidental             |                        |               |        | Unknown |                                                                      | 9,0  | Unknown | Myomectomy  | LPT     | No or in a bag | 0-4 | None      | Present | No | No  |        |     |                 | 88  | Unknown |                                                 |
|                       | 2018 |    |             | 51 |   |  | Unknown    | Unknown | Unknown | Incidental             |                        |               |        | Unknown |                                                                      | 20,0 | Unknown | Isterectomy | LPT     | No or in a bag | 0-4 | None      | Present | No | No  |        |     |                 | 18  | Unknown |                                                 |
|                       | 2018 |    |             | 44 |   |  | Unknown    | Unknown | Unknown | Incidental             |                        |               |        | Unknown |                                                                      | 9,0  | Unknown | Isterectomy | LPT     | No or in a bag | 0-4 | None      | Present | No | No  |        |     |                 | 54  | Unknown |                                                 |
|                       | 2018 |    |             | 43 |   |  | Unknown    | Unknown | Unknown | Incidental             |                        |               |        | Unknown |                                                                      | 6,5  | Unknown | Isterectomy | LPT     | No or in a bag | 0-4 | None      | Present | No | No  |        |     |                 | 56  | Unknown |                                                 |

|                             |      |   |              |    |   |  |         |         |         |                       |  |               |  |         |                                 |      |         |             |         |                |         |           |         |           |     |         |       |               |     |         |                                       |
|-----------------------------|------|---|--------------|----|---|--|---------|---------|---------|-----------------------|--|---------------|--|---------|---------------------------------|------|---------|-------------|---------|----------------|---------|-----------|---------|-----------|-----|---------|-------|---------------|-----|---------|---------------------------------------|
|                             | 2018 |   |              | 51 |   |  | Unknown | Unknown | Unknown | Incidentally detected |  |               |  | Unknown |                                 | 7,0  | Unknown | TAH + BSO   | LPT     | No or in a bag | 0-4     | Mode rate | Absent  | No        | No  |         |       |               | 74  | Unknown |                                       |
|                             | 2018 |   |              | 52 |   |  | Unknown | Unknown | Unknown | Incidentally detected |  |               |  | Unknown |                                 |      | Unknown | TAH + BSO   | LPT     | No or in a bag | 0-4     | Mild      | Present | No        | Yes | Pelvis  | LMS   | Mass excision | 95  | Unknown | Died of disease after 95 months       |
|                             | 2018 |   |              | 51 |   |  | Unknown | Unknown | Unknown | Incidentally detected |  |               |  | Unknown |                                 | 9,0  | Unknown | TAH + BSO   | LPT     | No or in a bag | 0-4     | Mild      | Present | No        | Yes | Pelvis  | LMS   | Mass excision | 69  | Unknown | Free from disease after 154 months    |
|                             | 2018 |   |              | 28 |   |  | Unknown | Unknown | Unknown | Incidentally detected |  |               |  | Unknown |                                 | 9,0  | Unknown | Myomectomy  | LPT     | No or in a bag | 0-4     | None      | Present | No        | Yes | Uterus  | STUMP | Myomectomy    | 154 | Unknown | Free from disease after 45 months     |
|                             | 2018 |   |              | 38 |   |  | Unknown | Unknown | Unknown | Incidentally detected |  |               |  | Unknown |                                 |      | Unknown | Myomectomy  | LPT     | No or in a bag | 0-4     | None      | Present | No        | Yes | Uterus  | LMS   | TAH + BSO     | 45  | Unknown | Free from disease after 69 months     |
| Bacanagli BH et al. (39)    | 2017 | 6 | Cas e series | 48 | 5 |  | Unknown | No      | Unknown | Menorrhagia           |  | Pelvic masses |  | Unknown | Well-defined heterogeneous mass | 3,5  | IM      | TAH + BSO   | LPT     | No or in a bag | 0-4     | Mild      | Present | No        | No  |         |       |               | 120 | Unknown |                                       |
|                             | 2017 |   |              | 44 | 6 |  | Unknown | No      | Unknown | Menorrhagia           |  |               |  | Unknown | Well-defined heterogeneous mass | 8,0  | SM      | TAH + BSO   | LPT     | No or in a bag | ≥10     | Mode rate | Present | No        | No  |         |       |               | 119 | Unknown |                                       |
|                             | 2017 |   |              | 40 | 2 |  | Unknown | No      | Unknown | Menorrhagia           |  |               |  | Unknown | Well-defined hypercholeic mass  | 7,0  | IM      | Myomectomy  | Unknown | Unknown        | 5-9     | Mode rate | Absent  | No        | No  |         |       |               |     | Unknown |                                       |
|                             | 2017 |   |              | 43 | 4 |  | Unknown | No      | Unknown | Menorrhagia           |  |               |  | Unknown | Well-defined hypercholeic mass  | 20,0 | IM      | TAH + BSO   | LPT     | No or in a bag | 5-9     | Mode rate | Absent  | No        | No  |         |       |               | 38  | Unknown |                                       |
|                             | 2017 |   |              | 52 | 4 |  | Unknown | No      | Unknown | Menorrhagia           |  |               |  | Unknown | Well-defined hypercholeic mass  | 10,0 | IM      | TAH + BSO   | LPT     | No or in a bag | 5-9     | Mild      | Absent  | No        | No  |         |       |               | 29  | Unknown |                                       |
|                             | 2017 |   |              | 24 | 0 |  | Unknown | Unknown | Unknown | Menorrhagia           |  |               |  | Unknown | Well-defined hypercholeic mass  | 8,0  | IM      | Myomectomy  | Unknown | Unknown        | 5-9     | Mode rate | Absent  | No        | Yes | Unknown | STUMP | Myomectomy    | 11  | Unknown |                                       |
| Bogani G et al. (40)        | 2016 | 1 | Cas e report | 37 | 2 |  | Unknown | No      | Unknown | Menorrhagia           |  |               |  | Unknown |                                 | 13,0 | SS      | Myomectomy  | LPS     | Yes            | Unknown | Unknown   | Unknown | TAH + BSO | Yes | Abdomen | STUMP | Mass excision |     | Unknown |                                       |
| Sakuragay Y et al. (41)     | 2016 | 1 | Cas e report | 68 |   |  | Unknown | Unknown | Unknown | Incidentally detected |  |               |  | Unknown |                                 |      | Unknown | Isterectomy | Unknown | Unknown        | 5-9     | Unknown   | Unknown | No        | Yes | Lung    | STUMP | Mass excision | 2   | Unknown | recurrence sites: lung and scalp skin |
| Kalogiannidis I et al. (42) | 2016 | 5 | Cas e series | 46 |   |  | Unknown | Unknown | Unknown | Menorrhagia           |  |               |  | Unknown |                                 | 6,0  | Unknown | TAH + BSO   | LPT     | No or in a bag | 0-4     | Severe    | Absent  | No        | No  |         |       |               | 132 | Unknown |                                       |
|                             | 2016 |   |              | 43 |   |  | Unknown | Unknown | Unknown | Menorrhagia           |  |               |  | Unknown |                                 | 5,0  | Unknown | Isterectomy | LPT     | No or in a bag | 0-4     | Severe    | Absent  | No        | No  |         |       |               | 108 | Unknown |                                       |
|                             | 2016 |   |              | 42 |   |  | Unknown | Unknown | Unknown | Menorrhagia           |  |               |  | Unknown |                                 | 4,0  | Unknown | Isterectomy | LPT     | No or in a bag | 0-4     | Severe    | Absent  | No        | No  |         |       |               | 72  | Unknown |                                       |
|                             | 2016 |   |              | 43 |   |  | Unknown | Unknown | Unknown | Incidentally detected |  |               |  | Unknown |                                 | 4,0  | Unknown | Myomectomy  | LPS     | Unknown        | 5-9     | Severe    | Absent  | No        | No  |         |       |               | 28  | Unknown |                                       |
|                             | 2016 |   |              | 26 |   |  | Unknown | Unknown | Unknown | Incidentally detected |  |               |  | Unknown |                                 | 6,5  | Unknown | Myomectomy  | LPT     | No or in a bag | 0-4     | Severe    | Absent  | No        | No  |         |       |               | 15  | Unknown |                                       |

|                            |      |   |            |    |   |   |         |         |         |                                |                       |               |  |         |                                                                                                                    |      |         |             |     |                |         |          |         |             |     |         |       |               |    |         |         |                 |
|----------------------------|------|---|------------|----|---|---|---------|---------|---------|--------------------------------|-----------------------|---------------|--|---------|--------------------------------------------------------------------------------------------------------------------|------|---------|-------------|-----|----------------|---------|----------|---------|-------------|-----|---------|-------|---------------|----|---------|---------|-----------------|
| Campbell JE et al. (43)    | 2015 | 1 | Casereport | 41 | 4 | 1 | Unknown | No      | Unknown | Menorrhagia                    | Abdominal/pelvic pain |               |  | Unknown |                                                                                                                    | 10,0 | IM      | Myomectomy  | LPT | No or in a bag | 5-9     | Mild     | Present | Isterectomy | No  |         |       |               |    | 48      | Yes     |                 |
| Mowers EL et al. (44)      | 2015 | 5 | Caseries   | 38 |   |   | Unknown | Unknown | Unknown | Incidentally detected          |                       |               |  | Unknown |                                                                                                                    |      | Unknown | TAH + BSO   | LPS | No or in a bag | Unknown | Unknown  | Unknown | No          | Yes | Pelvis  | STUMP | Mass excision | 3  | Unknown |         |                 |
|                            | 2015 |   |            | 40 |   |   | Unknown | Unknown | Unknown | Incidentally detected          |                       |               |  | Unknown |                                                                                                                    |      | Unknown | Isterectomy | LPS | Yes            | Unknown | Unknown  | Unknown | No          | Yes | Abdomen | STUMP | Mass excision | 24 | Unknown |         |                 |
|                            | 2015 |   |            | 50 |   |   | Unknown | Unknown | Unknown | Incidentally detected          |                       |               |  | Unknown |                                                                                                                    |      | Unknown | TAH + BSO   | LPS | Yes            | Unknown | Unknown  | Unknown | No          | Yes | Abdomen | STUMP | Mass excision | 35 | Unknown |         |                 |
|                            | 2015 |   |            | 47 |   |   | Unknown | Unknown | Unknown | Incidentally detected          |                       |               |  | Unknown |                                                                                                                    |      | Unknown | Isterectomy | LPS | Yes            | Unknown | Unknown  | Unknown | No          | Yes | Pelvis  | STUMP | Mass excision | 28 | Unknown |         |                 |
|                            | 2015 |   |            | 50 |   |   | Unknown | Unknown | Unknown | Incidentally detected          |                       |               |  | Unknown |                                                                                                                    |      | Unknown | Myomectomy  | LPT | Yes            | Unknown | Unknown  | Unknown | No          | Yes | Pelvis  | STUMP | TAH + BSO     | 32 | Unknown |         |                 |
| Zhang R et al. (45)        | 2015 | 1 | Casereport | 42 |   |   | Unknown | Unknown | Unknown | Incidentally detected          |                       |               |  | Unknown |                                                                                                                    |      | Unknown | TAH + BSO   | LPT | No or in a bag | 0-4     | Severe   | Absent  | Unknown     | No  |         |       |               |    |         | Unknown | sign: fever     |
| Dall'Asta A et al. (46)    | 2014 | 5 | Caseries   | 44 | 0 |   | Unknown | Unknown | Unknown | AUB                            | Abdominal/pelvic pain | Anemia        |  | Unknown |                                                                                                                    | 12,0 | Unknown | Isterectomy | LPT | No or in a bag | Unknown | Severe   | Unknown | No          | No  |         |       |               |    | 81      | Unknown |                 |
|                            | 2014 |   |            | 51 | 2 | 2 | Unknown | No      | Unknown |                                |                       | Pelvic masses |  | < 35    |                                                                                                                    | 12,0 | Unknown | TAH + BSO   | LPT | No or in a bag | Unknown | Severe   | Present | No          | No  |         |       |               |    | 78      | Unknown |                 |
|                            | 2014 |   |            | 49 | 1 |   | No      | No      | Unknown | AUB                            |                       |               |  | Unknown |                                                                                                                    | 2,5  | Unknown | TAH + BSO   | LPT | No or in a bag | Unknown | Severe   | Absent  | No          | No  |         |       |               |    | 33      | Unknown |                 |
|                            | 2014 |   |            | 45 | 0 |   | Unknown | Unknown | Unknown | Incidentally detected          |                       |               |  | Unknown |                                                                                                                    | 14,0 | Unknown | Myomectomy  | LPT | No or in a bag | 0-4     | Severe   | Absent  | No          | No  |         |       |               |    | 19      | Unknown |                 |
|                            | 2014 |   |            | 48 | 2 |   | No      | No      | Unknown | AUB                            |                       |               |  | Unknown |                                                                                                                    |      | IM      | Myomectomy  | LPS | Unknown        | 0-4     | Mild     | Absent  | TAH + BSO   | No  |         |       |               |    | 3       | Unknown |                 |
| Kotsopoulos IC et al. (47) | 2012 | 1 | Casereport | 51 | 0 |   | D&C     | Unknown | Unknown | Menorrhagia                    |                       |               |  | Unknown |                                                                                                                    | 5,0  | IM      | Isterectomy | LPT | No or in a bag | 0-4     | Moderate | Absent  | No          | Yes | Lung    | STUMP |               |    | 11      | Unknown | Died of disease |
| Seidman MA et al. (7)      | 2012 | 3 | Caseries   | 24 |   |   | Unknown | Unknown | Unknown |                                |                       | Pelvic masses |  | Unknown |                                                                                                                    | 6,6  | Unknown | Myomectomy  | LPS | Yes            | Unknown | Unknown  | Unknown | No          | Yes | Unknown | STUMP |               |    | 12      | Unknown |                 |
|                            | 2012 |   |            | 41 |   |   | Unknown | Unknown | Unknown |                                |                       | Pelvic masses |  | Unknown |                                                                                                                    | 10,0 | Unknown | Myomectomy  | LPS | Yes            | Unknown | Unknown  | Unknown | No          | Yes | Unknown | STUMP |               |    | 13      | Unknown |                 |
|                            | 2012 |   |            | 45 |   |   | Unknown | Unknown | Unknown |                                |                       | Pelvic masses |  | Unknown |                                                                                                                    | 8,7  | Unknown | Isterectomy | LPS | Yes            | Unknown | Unknown  | Unknown | No          | Yes | Unknown | STUMP |               |    | 28      | No      |                 |
| Hsieh J et al. (48)        | 2012 | 1 | Casereport | 37 | 0 | 0 | No      | No      | Unknown | Compression of adjacent organs |                       | Pelvic masses |  | Unknown | MR: characterized a 4.6×4.2×4.0 cm mass located within the anterior vaginal wall with mild homogeneous enhancement | 4,6  | Unknown | Myomectomy  | LPT | No or in a bag | 0-4     | Moderate | Absent  | Unknown     | No  |         |       |               |    |         | Unknown |                 |
| Vilos AG et al. (49)       | 2012 | 2 | Casereport | 35 | 1 | 0 | No      | No      | < 30    | AUB                            |                       | Pelvic        |  | Unknown | Multiple myomas, with                                                                                              | 9,8  | IM      | Myomectomy  | LPT | No or in a bag | 5-9     | Severe   | Absent  | Isterectomy | No  |         |       |               |    | 60      | Unknown |                 |



|                              |      |    |            |    |   |   |         |         |         |                                |              |             |         |                                                                                                        |      |         |             |         |                |         |          |         |             |     |        |       |               |     |    |                                    |  |  |
|------------------------------|------|----|------------|----|---|---|---------|---------|---------|--------------------------------|--------------|-------------|---------|--------------------------------------------------------------------------------------------------------|------|---------|-------------|---------|----------------|---------|----------|---------|-------------|-----|--------|-------|---------------|-----|----|------------------------------------|--|--|
|                              |      |    | series     |    |   |   |         |         |         |                                | mass         |             |         | the largest located posteriorly and measuring 9.7x9.8x8.8 cm, and another that measured 3.6x2.3x2.3 cm |      |         |             |         |                |         |          |         |             |     |        |       |               |     |    |                                    |  |  |
|                              | 2012 |    |            | 39 | 0 | 0 | No      | Yes     | < 30    | Abdominal /pelvic pain         |              | Pelvic mass | Unknown | Multiple uterine myomas, with the 2 largest measuring 8.6x7.4x7.2 cm and 6.0x6.0x5.3 cm                |      | IM-SS   | Myomectomy  | LPT     | No or in a bag | 0-4     | Mild     | Present | Isterectomy | No  |        |       |               |     | 40 | Unknown                            |  |  |
| Canciani GN et al. (50)      | 2012 | 1  | Casereport | 48 |   |   | No      | Unknown | Unknown | Compression of adjacent organs |              | Pelvic mass | Unknown |                                                                                                        |      | Unknown | Isterectomy | LPT     | No or in a bag | 0-4     | Mild     | Absent  | No          | Yes | Pelvis | STUMP | Mass excision | 288 | No |                                    |  |  |
| Hong IH et al. (51)          | 2011 | 1  | Casereport | 49 |   |   | Unknown | Unknown | Unknown | Abdominal /pelvic pain         |              | Pelvic mass | Unknown | CT showed a 10x17x19 cm mass at the posterior side of the uterus                                       | 17,0 | SS      | TAH + BSO   | LPT     | No or in a bag | 5-9     | Moderate | Absent  | Unknown     | No  |        |       |               |     |    | No                                 |  |  |
| Müller Vranjes A et al. (52) | 2011 | 1  | Casereport | 37 |   |   | Unknown | Unknown | Unknown | Abdominal /pelvic pain         |              | Pelvic mass | Unknown |                                                                                                        | 20,0 | Unknown | Myomectomy  | LPT     | No or in a bag | Unknown | Unknown  | Unknown | Isterectomy | No  |        |       |               |     |    | Unknown                            |  |  |
| Gezginc K et al. (53)        | 2011 | 1  | Casereport | 42 | 0 |   | No      | No      | Unknown | Menorrhagia                    | Dysmenorrhea | Pelvic mass | < 35    | 9x7 cm heterogeneous mass in the uterus cavity                                                         | 9,0  | SM      | TAH + BSO   | LPT     | No or in a bag | 0-4     | Mild     | Present | No          | No  |        |       |               |     | 24 | No                                 |  |  |
| Yoon BS et al. (54)          | 2011 | 1  | Casereport | 28 | 0 | 0 | No      | No      | Unknown | Menorrhagia                    |              | Pelvic mass | Unknown | Multiple intramural leiomyomata, including 3 measuring 8,0x7.5 cm, 6.8x5.1 cm, and 6.0x5.8 cm.         | 8,0  | IM      | Myomectomy  | LPT     | No or in a bag | 5-9     | Severe   | Absent  | No          | Yes | Uterus | LMS   | Isterectomy   | 36  | No | Alive after 36 months of follow up |  |  |
| IP PP et al. (55)            | 2009 | 16 | Caseries   | 50 |   |   | Unknown | Unknown | Unknown | AUB                            |              |             | Unknown |                                                                                                        | 4,0  | IM      | TAH + BSO   | Unknown | Unknown        | 0-4     | Moderate | Present | No          | Yes | Pelvis | LMS   | Mass excision | 51  | No | Alive 74 months afet mass excision |  |  |

|                        |       |   |              |    |   |   |          |          |          |                                 |  |               |  |          |                                                                              |      |    |              |          |                |     |           |          |              |     |        |        |                  |    |          |                                  |
|------------------------|-------|---|--------------|----|---|---|----------|----------|----------|---------------------------------|--|---------------|--|----------|------------------------------------------------------------------------------|------|----|--------------|----------|----------------|-----|-----------|----------|--------------|-----|--------|--------|------------------|----|----------|----------------------------------|
|                        | 20 09 |   |              | 52 |   |   | Unknow n | Unkn own | Unkn own | AUB                             |  | Ane mia       |  | Unkn own |                                                                              | 7,5  | IM | TAH + BSO    | Unkn own | Unknow n       | 0-4 | Mode rate | Abse nt  | No           | No  |        |        |                  |    | No       |                                  |
|                        | 20 09 |   |              | 39 |   |   | Unknow n | Unkn own | Unkn own | AUB                             |  | Pelv ic mas s |  | Unkn own |                                                                              | 5,8  | IM | Isterecto my | Unkn own | Unknow n       | 5-9 | Mode rate | Prese nt | No           | Yes | Pelvis | LMS    | Debulki ng + CTx | 15 | No       | Alive 40 months after Debulki ng |
|                        | 20 09 |   |              | 39 |   |   | Unknow n | Unkn own | Unkn own | AUB                             |  |               |  | Unkn own |                                                                              | 5,0  | SM | TAH + BSO    | Unkn own | Unknow n       | 5-9 | Mild      | Prese nt | No           | No  |        |        |                  |    | No       |                                  |
|                        | 20 09 |   |              | 56 |   |   | Unknow n | Unkn own | Unkn own |                                 |  | Pelv ic mas s |  | Unkn own |                                                                              | 10,0 | IM | TAH + BSO    | Unkn own | Unknow n       | 0-4 | Mode rate | Prese nt | No           | No  |        |        |                  |    | No       |                                  |
|                        | 20 09 |   |              | 64 |   |   | Unknow n | Unkn own | Unkn own |                                 |  | Pelv ic mas s |  | Unkn own |                                                                              | 6,0  | IM | TAH + BSO    | Unkn own | Unknow n       | 0-4 | Mode rate | Prese nt | No           | No  |        |        |                  |    | No       |                                  |
|                        | 20 09 |   |              | 46 |   |   | Unknow n | Unkn own | Unkn own | AUB                             |  |               |  | Unkn own |                                                                              | 12,0 | SM | TAH + BSO    | Unkn own | Unknow n       | 0-4 | Sever e   | Prese nt | No           | No  |        |        |                  |    | No       |                                  |
|                        | 20 09 |   |              | 50 |   |   | Unknow n | Unkn own | Unkn own | AUB                             |  | Ane mia       |  | Unkn own |                                                                              | 0,7  | IM | Myome ctomy  | Unkn own | Unknow n       | 0-4 | Sever e   | Prese nt | Isterect omy | No  |        |        |                  |    | No       |                                  |
|                        | 20 09 |   |              | 48 |   |   | Unknow n | Unkn own | Unkn own |                                 |  | Pelv ic mas s |  | Unkn own |                                                                              | 17,0 | IM | TAH + BSO    | Unkn own | Unknow n       | 5-9 | Sever e   | Prese nt | No           | No  |        |        |                  |    | No       |                                  |
|                        | 20 09 |   |              | 40 |   |   | Unknow n | Unkn own | Unkn own |                                 |  | Pelv ic mas s |  | Unkn own |                                                                              | 8,5  | IM | TAH + BSO    | Unkn own | Unknow n       | 5-9 | Sever e   | Prese nt | No           | No  |        |        |                  |    | No       |                                  |
|                        | 20 09 |   |              | 59 |   |   | Unknow n | Unkn own | Unkn own | AUB                             |  |               |  | Unkn own |                                                                              | 18,0 | IM | TAH + BSO    | Unkn own | Unknow n       | 0-4 | Sever e   | Prese nt | No           | No  |        |        |                  |    | No       |                                  |
|                        | 20 09 |   |              | 25 |   |   | Unknow n | Unkn own | Unkn own |                                 |  | Pelv ic mas s |  | Unkn own |                                                                              | 16,0 | IM | TAH + BSO    | Unkn own | Unknow n       | 5-9 | None      | Prese nt | No           | No  |        |        |                  |    | No       |                                  |
|                        | 20 09 |   |              | 49 |   |   | Unknow n | Unkn own | Unkn own |                                 |  | Pelv ic mas s |  | Unkn own |                                                                              | 11,0 | IM | TAH + BSO    | Unkn own | Unknow n       | 5-9 | None      | Prese nt | No           | No  |        |        |                  |    | No       |                                  |
|                        | 20 09 |   |              | 46 |   |   | Unknow n | Unkn own | Unkn own | AUB                             |  |               |  | Unkn own |                                                                              | 5,0  | SS | Myome ctomy  | Unkn own | Unknow n       | 5-9 | Sever e   | Prese nt | No           | No  |        |        |                  |    | Unkno wn |                                  |
|                        | 20 09 |   |              | 50 |   |   | Unknow n | Unkn own | Unkn own | AUB                             |  |               |  | Unkn own |                                                                              |      | SM | TAH + BSO    | Unkn own | Unknow n       | 0-4 | Sever e   | Abse nt  | No           | No  |        |        |                  |    | No       |                                  |
|                        | 20 09 |   |              | 44 |   |   | Unknow n | Unkn own | Unkn own | AUB                             |  | Ane mia       |  | Unkn own |                                                                              | 5,0  | SM | Myome ctomy  | Unkn own | Unknow n       | ≥10 | Sever e   | Prese nt | Isterect omy | No  |        |        |                  |    | No       |                                  |
| Berretta R et al. (56) | 20 08 | 3 | Cas e series | 44 | 2 | 0 | No       | No       | Unkn own | Compressi on of adjacent organs |  | Pelv ic mas s |  | Unkn own | Multiple intramur al leiomyo mas and one 8x3x8 cm subserou s anterior myoma. | 8,0  | SS | Isterecto my | LPT      | No or in a bag | 0-4 | Mild      | Prese nt | No           | No  |        |        |                  | 60 | No       |                                  |
|                        | 20 08 |   |              | 35 | 0 | 1 | No       | No       | Unkn own | Compressi on of adjacent organs |  | Pelv ic mas s |  | Unkn own | Subseros al, peduncu lated myoma                                             | 16,0 | SS | Myome ctomy  | LPT      | No or in a bag | ≥10 | Mild      | Abse nt  | No           | No  |        |        |                  | 12 | No       |                                  |
|                        | 20 08 |   |              | 37 | 2 | 0 | No       | No       | Unkn own | AUB                             |  |               |  | Unkn own | Leiomyo ma measuri ng 8x3x7 cm                                               | 10,0 | IM | Isterecto my | LPT      | No or in a bag | 5-9 | Sever e   | Abse nt  | No           | Yes | Lung   | STUM P | Mass excision    | 60 | No       |                                  |
| Huang SE et al. (57)   | 20 08 | 1 | Cas e        | 47 | 2 | 0 | No       | No       | Unkn own | Compressi on of                 |  | Pelv ic       |  | > 35     |                                                                              | 20,0 | SS | TAH + BSO    | LPT      | No or in a bag | 5-9 | Sever e   | Abse nt  | No           | No  |        |        |                  | 24 | No       |                                  |

|                             |          |   |                        |    |   |   |    |    |             |                    |  |            |  |             |                                                                               |     |    |              |             |                   |     |            |             |    |     |               |     |                  |    |    |  |                                                                                                                                                                                                     |  |
|-----------------------------|----------|---|------------------------|----|---|---|----|----|-------------|--------------------|--|------------|--|-------------|-------------------------------------------------------------------------------|-----|----|--------------|-------------|-------------------|-----|------------|-------------|----|-----|---------------|-----|------------------|----|----|--|-----------------------------------------------------------------------------------------------------------------------------------------------------------------------------------------------------|--|
|                             |          |   | rep<br>ort             |    |   |   | No | No |             | adjacent<br>organs |  | mas<br>s   |  |             |                                                                               |     |    |              |             |                   |     |            |             |    |     |               |     |                  |    |    |  |                                                                                                                                                                                                     |  |
| Amant<br>F et al.<br>(58)   | 20<br>05 | 1 | Cas<br>e<br>rep<br>ort | 48 | 2 | 0 | No | No | Unkn<br>own | AUB                |  |            |  | Unkn<br>own |                                                                               | 7,0 | SS | TAH +<br>BSO | LPT         | No or in<br>a bag | 0-4 | None       | Prese<br>nt | No | Yes | Pelvis        | LMS | Mass<br>excision | 48 | No |  |                                                                                                                                                                                                     |  |
| Shapiro<br>A et al.<br>(59) | 20<br>04 | 1 | Cas<br>e<br>rep<br>ort | 46 | 8 | 0 | No | No | Unkn<br>own | Menorrhag<br>ia    |  | Anem<br>ia |  | Unkn<br>own | Single,<br>submuc<br>us<br>leiomy<br>oma<br>measuri<br>ng<br>3,5x4x4,<br>5 cm | 4,0 | SM | TAH +<br>BSO | Unkn<br>own | Unknow<br>n       | ≥10 | Sever<br>e | Abse<br>nt  | No | Yes | Other<br>site | LMS | Mass<br>excision | 51 | No |  | 51<br>months<br>after<br>isterecto<br>my:<br>fracture<br>of the<br>right<br>humerus<br>(LMS) -<br>-> Mass<br>excision.<br>12<br>months<br>later:<br>lung<br>nodules<br>(metasta<br>sis from<br>LMS) |  |

Abbreviations: CS: cesarean section; BMI: body mass index (kg/m<sup>2</sup>); AUB: abnormal uterine bleeding; US: ultrasounds; MRI: magnetic resonance; CT: computed tomography; IM: intramural; SS: subserosal; SM: submucosal; TAH: total abdominal hysterectomy; BSO: bilateral salpingo-oophorectomy; D&C: dilation&curettage; LPS: laparoscopy; LPT: laparotomy; HSC: hysteroscopy; LMS: leiomyosarcoma; LM: leiomyoma; CTx: chemotherapy.
